# Supplementary material
Source: PubMed Central journal article supplement (PMC5027881)

# CS+/LiCl Aversion Conditioning

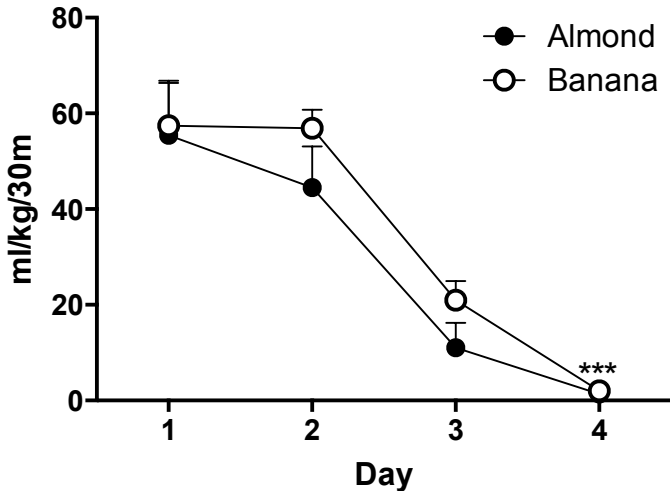

Supplement: NIHMS813858-supplement-Fig_S1.pdf [file NIHMS813858-supplement-Fig_S1.pdf]

# CTA Induction

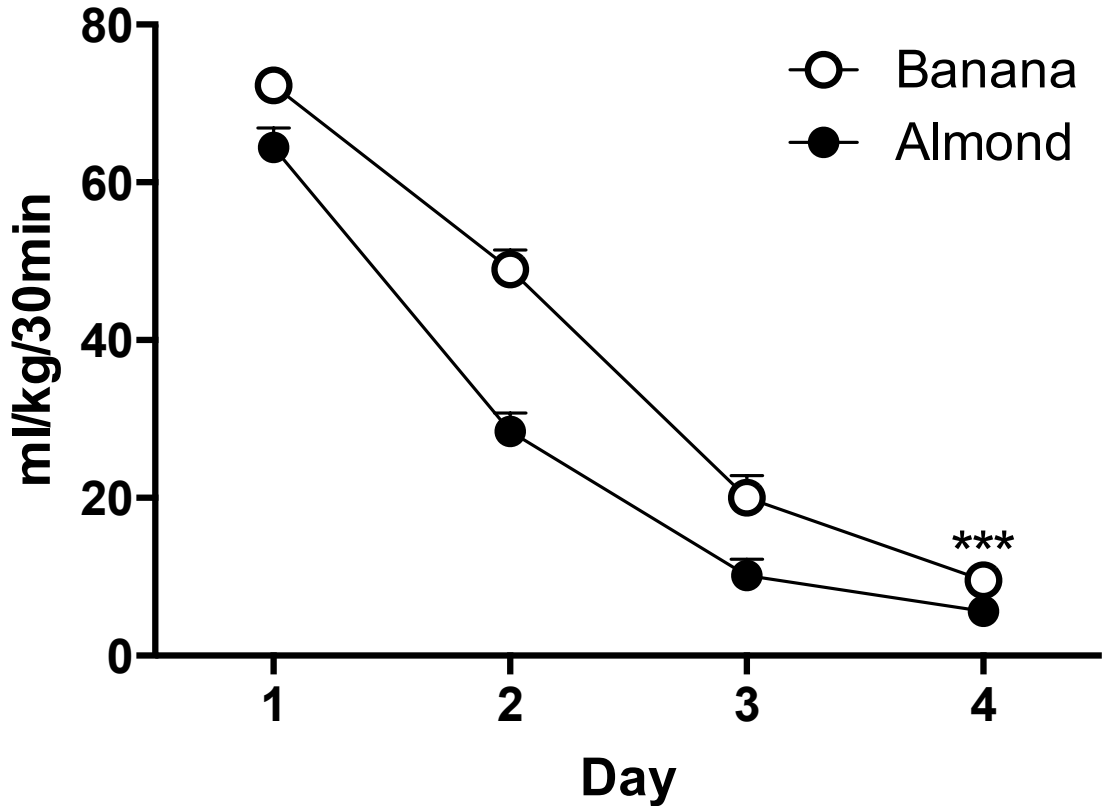

Supplement: NIHMS813858-supplement-Fig_S2.pdf [file NIHMS813858-supplement-Fig_S2.pdf]
